# Supplementary material for: Glioblastoma Primary Cells Retain the Most Copy Number Alterations That Predict Poor Survival in Glioma Patients
Source: Front Oncol. 2021 Apr 26;11:621432. doi: 10.3389/fonc.2021.621432 (PMC8108987; doi:10.3389/fonc.2021.621432)
Supplement: Supplementary Table 5 — The disease and biological functions significantly correlated to the genes with CNA preserved or lost in primary cells. [file Table_4.xlsx]

## Sheet: S5
Categories	Diseases or Functions Annotation	p-value	Predicted Activation State	Activation z-score	Molecules	# Molecules
LGG CNA-preserved
Cellular Development,Cellular Growth and Proliferation	Colony formation of lung cancer cell lines	0.000446	Increased	2	RASSF1,SEMA3B,SEMA3F,TUSC2	4
Cellular Movement,Hair and Skin Development and Function	Cell movement of epithelial cell lines	0.000733		-1.467	CAMP,ITGAM,MST1R,PLXNB1,RASSF1,RHOA	6
Cell-To-Cell Signaling and Interaction	Adhesion of tumor cell lines	0.00132		-1.609	DAG1,HYAL1,IP6K2,ITGAM,ITGAX,RASSF1,RHOA,SEMA3F,TGFB1I1	9
Cellular Movement,Hematological System Development and Function,Immune Cell Trafficking,Inflammatory Response	Cell movement of monocytes	0.00164		-1.964	CAMP,ITGAM,ITGAX,MST1,RHOA	5
Cellular Movement,Embryonic Development	Cell movement of embryonic cell lines	0.00229		-1.964	CAMP,ITGAM,MST1R,PLXNB1,RHOA	5
Cellular Movement,Hematological System Development and Function,Immune Cell Trafficking,Inflammatory Response	Migration of phagocytes	0.00229		-1.154	CAMP,ITGAM,ITGAX,MST1,RHOA	5
Cellular Movement	Cell movement of colorectal cancer cell lines	0.00249	Decreased	-2.418	CAMP,IP6K2,MST1,MST1R,RHOA,USP4	6
Cellular Movement,Renal and Urological System Development and Function	Cell movement of kidney cell lines	0.00293		-1.972	CAMP,ITGAM,MST1R,PLXNB1,RHOA	5
Cellular Movement	Migration of colorectal cancer cell lines	0.00535	Decreased	-2.2	CAMP,IP6K2,MST1,RHOA,USP4	5
Cell Death and Survival	Cell death of carcinoma cell lines	0.00592	Decreased	-2.181	CACNA2D2,CAMP,CDKN2C,GPX1,IP6K2,mir-191,MST1,RASSF1,SEMA3B	9
DNA Replication, Recombination, and Repair	Metabolism of DNA	0.00602		-1.432	ATRIP,CAMP,CDC25A,DCAF1,FAF1,GPX1,TREX1	7
Cancer,Organismal Injury and Abnormalities	Growth of tumor	0.00726		-1.342	DCAF1,MAPKAPK3,mir-191,MST1,MST1R,SEMA3B	6
Cellular Movement,Hematological System Development and Function,Immune Cell Trafficking	Cell movement of mononuclear leukocytes	0.013	Decreased	-2.189	CAMP,GNAI2,ITGAM,ITGAX,MST1,RHOA	6
Cellular Development,Cellular Growth and Proliferation	Proliferation of lung cancer cell lines	0.0185		0.484	CAMP,mir-191,MST1R,PCBP4,RASSF1,SEMA3B,TUSC2	7
Cellular Development,Cellular Growth and Proliferation,Reproductive System Development and Function	Cell proliferation of breast cell lines	0.0191	Decreased	-2	MST1,MST1R,RHOA,TRAIP	4
Cellular Movement,Hematological System Development and Function,Immune Cell Trafficking,Inflammatory Response	Chemotaxis of mononuclear leukocytes	0.0208		-1.949	CAMP,GNAI2,MST1,RHOA	4
Cell Death and Survival	Apoptosis of carcinoma cell lines	0.0216		-1.977	CACNA2D2,CAMP,CDKN2C,GPX1,IP6K2,RASSF1,SEMA3B	7
Cellular Movement	Migration of lung cancer cell lines	0.0222		-1.067	CAMP,COL7A1,RASSF1,RHOA	4
Cell Death and Survival	Cell death of ovarian cancer cell lines	0.0286		-1.103	IP6K2,MST1,RASSF1,SEMA3F	4
LGG CNA-lost
Cancer,Organismal Injury and Abnormalities	Non-hematological solid tumor	8.31e-13		-1.396	A1BG,AADACL3,AADACL4,ABCA4,ABCD3,ACADM,ACAP3,ACOT11,ACOT7,ACP7,ACTL8,ACTN4,ACTRT2,ADAM30,ADK,ADORA3,ADPRHL2,AGAP5 (includes others),AGBL4,AGL,AGMAT,AGO1,AGRN,AHCYL1,AHDC1,AJAP1,AK2,AK4,AK5,AKIRIN1,AKNAD1,AKR1A1,AKR7A2,AKR7A3,AKT1S1,AKT2,ALAS1,ALDH16A1,ALDH4A1,ALG6,ALKBH6,ALPL,ALX3,AMIGO1,AMPD1,AMPD2,AMY1C (includes others),AMY2A,AMY2B,ANAPC16,ANGPTL3,ANGPTL7,ANKRD13C,ANKRD27,ANKRD65,ANXA7,AP2A1,A…	1716
Cancer,Organismal Injury and Abnormalities	Non-melanoma solid tumor	1.34e-12		-1.226	A1BG,AADACL3,AADACL4,ABCA4,ABCD3,ACADM,ACAP3,ACOT11,ACOT7,ACP7,ACTL8,ACTN4,ACTRT2,ADAM30,ADK,ADORA3,ADPRHL2,AGAP5 (includes others),AGBL4,AGL,AGMAT,AGO1,AGRN,AHCYL1,AHDC1,AJAP1,AK2,AK4,AK5,AKIRIN1,AKNAD1,AKR1A1,AKR7A2,AKR7A3,AKT1S1,AKT2,ALAS1,ALDH16A1,ALDH4A1,ALG6,ALKBH6,ALPL,ALX3,AMIGO1,AMPD1,AMPD2,AMY1C (includes others),AMY2A,AMY2B,ANAPC16,ANGPTL3,ANGPTL7,ANKRD13C,ANKRD27,ANKRD65,ANXA7,AP2A1,A…	1701
Cancer,Organismal Injury and Abnormalities	Tumorigenesis of tissue	1.8e-12		-0.943	A1BG,AADACL3,AADACL4,ABCA4,ABCD3,ACADM,ACAP3,ACOT11,ACOT7,ACP7,ACTL8,ACTN4,ACTRT2,ADAM30,ADK,ADORA3,ADPRHL2,AGAP5 (includes others),AGBL4,AGL,AGMAT,AGO1,AGRN,AHCYL1,AHDC1,AJAP1,AK2,AK4,AK5,AKIRIN1,AKNAD1,AKR1A1,AKR7A2,AKR7A3,AKT1S1,AKT2,ALAS1,ALDH16A1,ALDH4A1,ALG6,ALKBH6,ALPL,ALX3,AMIGO1,AMPD1,AMPD2,AMY1C (includes others),AMY2A,AMY2B,ANAPC16,ANGPTL3,ANGPTL7,ANKRD13C,ANKRD27,ANKRD65,ANXA7,AP2A1,A…	1695
Cancer,Organismal Injury and Abnormalities	Epithelial neoplasm	3.65e-12		-0.943	A1BG,AADACL3,AADACL4,ABCA4,ABCD3,ACADM,ACAP3,ACOT11,ACOT7,ACP7,ACTL8,ACTN4,ACTRT2,ADAM30,ADK,ADORA3,ADPRHL2,AGAP5 (includes others),AGBL4,AGL,AGMAT,AGO1,AGRN,AHCYL1,AHDC1,AJAP1,AK2,AK4,AK5,AKIRIN1,AKNAD1,AKR1A1,AKR7A2,AKR7A3,AKT1S1,AKT2,ALAS1,ALDH16A1,ALDH4A1,ALG6,ALKBH6,ALPL,ALX3,AMIGO1,AMPD1,AMPD2,AMY1C (includes others),AMY2A,AMY2B,ANAPC16,ANGPTL3,ANGPTL7,ANKRD13C,ANKRD27,ANKRD65,ANXA7,AP2A1,A…	1688
Cancer,Organismal Injury and Abnormalities	Carcinoma	4.02e-12		-0.943	A1BG,AADACL3,AADACL4,ABCA4,ABCD3,ACADM,ACAP3,ACOT11,ACOT7,ACP7,ACTL8,ACTN4,ACTRT2,ADAM30,ADK,ADORA3,ADPRHL2,AGAP5 (includes others),AGBL4,AGL,AGMAT,AGO1,AGRN,AHCYL1,AHDC1,AJAP1,AK2,AK4,AK5,AKIRIN1,AKNAD1,AKR1A1,AKR7A2,AKR7A3,AKT1S1,AKT2,ALAS1,ALDH16A1,ALDH4A1,ALG6,ALKBH6,ALPL,ALX3,AMIGO1,AMPD1,AMPD2,AMY1C (includes others),AMY2A,AMY2B,ANAPC16,ANGPTL3,ANGPTL7,ANKRD13C,ANKRD27,ANKRD65,ANXA7,AP2A1,A…	1686
Cancer,Organismal Injury and Abnormalities	Nonhematologic malignant neoplasm	6.79e-12		-1.396	A1BG,AADACL3,AADACL4,ABCA4,ABCD3,ACADM,ACAP3,ACOT11,ACOT7,ACP7,ACTL8,ACTN4,ACTRT2,ADAM30,ADK,ADORA3,ADPRHL2,AGAP5 (includes others),AGBL4,AGL,AGMAT,AGO1,AGRN,AHCYL1,AHDC1,AJAP1,AK2,AK4,AK5,AKIRIN1,AKNAD1,AKR1A1,AKR7A2,AKR7A3,AKT1S1,AKT2,ALAS1,ALDH16A1,ALDH4A1,ALG6,ALKBH6,ALPL,ALX3,AMIGO1,AMPD1,AMPD2,AMY1C (includes others),AMY2A,AMY2B,ANAPC16,ANGPTL3,ANGPTL7,ANKRD13C,ANKRD27,ANKRD65,ANXA7,AP2A1,A…	1708
Cancer,Organismal Injury and Abnormalities	Extracranial solid tumor	1.43e-09		-1.969	A1BG,AADACL3,AADACL4,ABCA4,ABCD3,ACADM,ACAP3,ACOT11,ACOT7,ACP7,ACTL8,ACTN4,ACTRT2,ADAM30,ADK,ADORA3,ADPRHL2,AGAP5 (includes others),AGBL4,AGL,AGMAT,AGO1,AGRN,AHCYL1,AHDC1,AJAP1,AK2,AK4,AK5,AKIRIN1,AKNAD1,AKR1A1,AKR7A2,AKR7A3,AKT1S1,AKT2,ALAS1,ALDH16A1,ALDH4A1,ALG6,ALKBH6,ALPL,ALX3,AMIGO1,AMPD1,AMPD2,AMY1C (includes others),AMY2A,AMY2B,ANAPC16,ANGPTL3,ANGPTL7,ANKRD13C,ANKRD27,ANKRD65,ANXA7,AP2A1,A…	1728
Cancer,Organismal Injury and Abnormalities	Solid tumor	2.97e-08	Decreased	-2.304	A1BG,AADACL3,AADACL4,ABCA4,ABCD3,ACADM,ACAP3,ACOT11,ACOT7,ACP7,ACTL8,ACTN4,ACTRT2,ADAM30,ADK,ADORA3,ADPRHL2,AGAP5 (includes others),AGBL4,AGL,AGMAT,AGO1,AGRN,AHCYL1,AHDC1,AJAP1,AK2,AK4,AK5,AKIRIN1,AKNAD1,AKR1A1,AKR7A2,AKR7A3,AKT1S1,AKT2,ALAS1,ALDH16A1,ALDH4A1,ALG6,ALKBH6,ALPL,ALX3,AMIGO1,AMPD1,AMPD2,AMY1C (includes others),AMY2A,AMY2B,ANAPC16,ANGPTL3,ANGPTL7,ANKRD13C,ANKRD27,ANKRD65,ANXA7,AP2A1,A…	1732
Cancer,Organismal Injury and Abnormalities	Cancer	1.32e-07	Decreased	-3.851	A1BG,AADACL3,AADACL4,ABCA4,ABCD3,ACADM,ACAP3,ACOT11,ACOT7,ACP7,ACTL8,ACTN4,ACTRT2,ADAM30,ADGRB2,ADGRL2,ADK,ADORA3,ADPRHL2,AGAP5 (includes others),AGBL4,AGL,AGMAT,AGO1,AGRN,AHCYL1,AHDC1,AJAP1,AK2,AK4,AK5,AKIRIN1,AKNAD1,AKR1A1,AKR7A2,AKR7A3,AKT1S1,AKT2,ALAS1,ALDH16A1,ALDH4A1,ALG6,ALKBH6,ALPL,ALX3,AMIGO1,AMPD1,AMPD2,AMY1C (includes others),AMY2A,AMY2B,ANAPC16,ANGPTL3,ANGPTL7,ANKRD13C,ANKRD27,ANKRD65…	1726
Cancer,Organismal Injury and Abnormalities	Malignant solid tumor	1.47e-07		-1.668	A1BG,AADACL3,AADACL4,ABCA4,ABCD3,ACADM,ACAP3,ACOT11,ACOT7,ACP7,ACTL8,ACTN4,ACTRT2,ADAM30,ADK,ADORA3,ADPRHL2,AGAP5 (includes others),AGBL4,AGL,AGMAT,AGO1,AGRN,AHCYL1,AHDC1,AJAP1,AK2,AK4,AK5,AKIRIN1,AKNAD1,AKR1A1,AKR7A2,AKR7A3,AKT1S1,AKT2,ALAS1,ALDH16A1,ALDH4A1,ALG6,ALKBH6,ALPL,ALX3,AMIGO1,AMPD1,AMPD2,AMY1C (includes others),AMY2A,AMY2B,ANAPC16,ANGPTL3,ANGPTL7,ANKRD13C,ANKRD27,ANKRD65,ANXA7,AP2A1,A…	1720
Cancer,Organismal Injury and Abnormalities	Abdominal neoplasm	4.64e-05		-0.605	A1BG,AADACL3,AADACL4,ABCA4,ABCD3,ACADM,ACAP3,ACOT11,ACOT7,ACP7,ACTL8,ACTN4,ACTRT2,ADAM30,ADK,ADORA3,ADPRHL2,AGAP5 (includes others),AGBL4,AGL,AGRN,AHCYL1,AHDC1,AJAP1,AK2,AK5,AKNAD1,AKR1A1,AKR7A2,AKR7A3,AKT1S1,AKT2,ALAS1,ALDH16A1,ALDH4A1,ALG6,ALKBH6,ALPL,ALX3,AMIGO1,AMPD1,AMPD2,AMY2A,AMY2B,ANAPC16,ANGPTL3,ANGPTL7,ANKRD13C,ANKRD27,ANKRD65,ANXA7,AP2A1,AP2S1,AP3M1,AP4B1,APLP1,APOC1,APOC4,APOE,ARHGAP2…	1569
Cancer,Organismal Injury and Abnormalities	Abdominal cancer	0.000163		-0.656	A1BG,AADACL3,AADACL4,ABCA4,ABCD3,ACADM,ACAP3,ACOT11,ACOT7,ACP7,ACTL8,ACTN4,ACTRT2,ADAM30,ADK,ADORA3,ADPRHL2,AGAP5 (includes others),AGBL4,AGL,AGRN,AHCYL1,AHDC1,AJAP1,AK2,AK5,AKNAD1,AKR1A1,AKR7A2,AKR7A3,AKT1S1,AKT2,ALAS1,ALDH16A1,ALDH4A1,ALG6,ALKBH6,ALPL,ALX3,AMIGO1,AMPD1,AMPD2,AMY2A,AMY2B,ANAPC16,ANGPTL3,ANGPTL7,ANKRD13C,ANKRD27,ANKRD65,ANXA7,AP2A1,AP3M1,AP4B1,APLP1,APOC1,APOC4,APOE,ARHGAP29,ARHG…	1544
Carbohydrate Metabolism,Small Molecule Biochemistry	Length of glycosaminoglycan	0.000882		-1.067	APOE,EXTL2,NDST2,TGFB1	4
Cell Death and Survival	Cytolysis	0.00197		-0.394	ADK,BAX,C8A,C8B,CD177,CD52,CEACAM1,F3,FCAR,FCGR1B,GPI,IL11,ISG15,JUN,KCNN4,KIR2DL1/KIR2DL3,KIR2DL4,KIR3DL1,KIR3DL2,LENG8,LILRB1,MPL,MTOR,NCR1,NECTIN2,PPP3CB,PTGIR,PVR,RHCE/RHD,RUNX3,SDHAF1,SH3BGRL3,TENT5C,TGFB1	34
Cell-To-Cell Signaling and Interaction,Embryonic Development	Binding of embryonic cells	0.00276		-1.387	CEACAM16,EPHA8,F3,KLK6,NPHS1,PLAU,PLAUR,PTGER3,RRAS,UTS2,VCAM1	11
Cell-To-Cell Signaling and Interaction,Cellular Assembly and Organization,Renal and Urological System Development and Function	Cell-cell contact of kidney cell lines	0.00355		0	CEACAM16,KLK6,PTGER3,TGFB1	4
Cancer,Gastrointestinal Disease,Organismal Injury and Abnormalities	Digestive organ tumor	0.00357		-0.509	A1BG,AADACL3,AADACL4,ABCA4,ABCD3,ACAP3,ACOT11,ACOT7,ACP7,ACTL8,ACTN4,ACTRT2,ADAM30,ADK,ADORA3,ADPRHL2,AGAP5 (includes others),AGBL4,AGL,AGRN,AHCYL1,AHDC1,AJAP1,AK2,AK5,AKNAD1,AKR1A1,AKR7A2,AKR7A3,AKT1S1,AKT2,ALAS1,ALDH16A1,ALDH4A1,ALG6,ALKBH6,ALPL,ALX3,AMPD1,AMPD2,AMY2A,AMY2B,ANAPC16,ANGPTL7,ANKRD13C,ANKRD27,ANKRD65,ANXA7,AP2A1,AP3M1,AP4B1,APLP1,APOC1,APOC4,APOE,ARHGAP29,ARHGAP33,ARHGAP35,ARHGEF1…	1464
Cancer,Organismal Injury and Abnormalities	Incidence of tumor	0.00359		-0.362	AADACL3,ABCA4,ABCD3,ACADM,ACAP3,ACOT7,ACTN4,ACTRT2,ADAM30,ADK,ADORA3,AGAP5 (includes others),AGBL4,AGL,AGO1,AGRN,AHCYL1,AHDC1,AJAP1,AK2,AK5,AKR1A1,AKR7A2,AKT2,ALAS1,ALDH16A1,ALDH4A1,ALKBH6,ALPL,ALX3,AMPD1,AMPD2,AMY2A,AMY2B,ANGPTL3,ANKRD27,ANXA7,AP2A1,AP2S1,AP4B1,APLP1,APOE,ARHGAP29,ARHGAP33,ARHGAP35,ARHGEF1,ARHGEF10L,ARHGEF16,ARID1A,ASAP3,ASCC1,ATAD3A,ATAD3B,ATG4C,ATP1A1,ATP4A,ATP5IF1,AUNIP,AURKC…	1097
Cell Death and Survival	Apoptosis of phagocytes	0.00387		-0.43	ADORA3,AXL,CSF1,FCAR,GBP1,IFNL1,IRF3,LEPR,LILRB1,NGF,OSCAR,PIK3CD,SIGLEC9,TGFB1,TLR9,TNFRSF9	16
Cell-To-Cell Signaling and Interaction,Hematological System Development and Function,Immune Cell Trafficking,Inflammatory Response	Priming of mononuclear leukocytes	0.00428		-1.732	CD2,CSF1,FLT3LG,LILRB2,TLR9	5
Cellular Development,Cellular Growth and Proliferation,Connective Tissue Development and Function,Hematological System Development and Function,Lymphoid Tissue Structure and Development,Tissue Development	Proliferation of PBMCs	0.0045		0.81	CEACAM1,CSF1,IFNL2,IL4I1,LGALS4,LILRB4,MFN2,MTOR,TGFB1,TLR9,TNFRSF9,TYROBP,VTCN1	13
Cancer,Gastrointestinal Disease,Organismal Injury and Abnormalities	Gastrointestinal tumor	0.00463		0.254	A1BG,AADACL3,AADACL4,ABCA4,ABCD3,ACAP3,ACOT7,ACP7,ACTL8,ACTN4,ACTRT2,ADAM30,ADK,ADORA3,ADPRHL2,AGAP5 (includes others),AGBL4,AGL,AGRN,AHCYL1,AHDC1,AJAP1,AK5,AKNAD1,AKR1A1,AKR7A2,AKT1S1,AKT2,ALAS1,ALDH16A1,ALDH4A1,ALG6,ALKBH6,ALPL,ALX3,AMPD1,AMPD2,AMY2A,AMY2B,ANGPTL7,ANKRD13C,ANKRD27,ANKRD65,ANXA7,AP2A1,AP3M1,AP4B1,APLP1,APOC1,APOE,ARHGAP33,ARHGAP35,ARHGEF1,ARHGEF10L,ARHGEF16,ARID1A,ARMH1,ASAP3,AS…	1323
Cancer,Gastrointestinal Disease,Organismal Injury and Abnormalities	Digestive system cancer	0.00502		0.254	A1BG,AADACL3,AADACL4,ABCA4,ABCD3,ACAP3,ACOT11,ACOT7,ACP7,ACTL8,ACTN4,ACTRT2,ADAM30,ADK,ADORA3,ADPRHL2,AGAP5 (includes others),AGBL4,AGL,AGRN,AHCYL1,AHDC1,AJAP1,AK2,AK5,AKNAD1,AKR1A1,AKR7A2,AKR7A3,AKT1S1,AKT2,ALAS1,ALDH16A1,ALDH4A1,ALG6,ALKBH6,ALPL,ALX3,AMPD1,AMPD2,AMY2A,AMY2B,ANAPC16,ANGPTL7,ANKRD13C,ANKRD27,ANKRD65,ANXA7,AP2A1,AP3M1,AP4B1,APLP1,APOC1,APOC4,APOE,ARHGAP29,ARHGAP33,ARHGAP35,ARHGEF1…	1435
Cell Morphology,Cellular Function and Maintenance	Autophagy of bone cancer cell lines	0.00566	Decreased	-2.621	BAX,BBC3,CAPNS1,mir-506,mir-515,PINK1,TP73	7
Cancer,Gastrointestinal Disease,Organismal Injury and Abnormalities	Gastrointestinal tract cancer	0.00611		0.254	A1BG,AADACL3,AADACL4,ABCA4,ABCD3,ACAP3,ACOT7,ACP7,ACTL8,ACTN4,ACTRT2,ADAM30,ADK,ADORA3,ADPRHL2,AGAP5 (includes others),AGBL4,AGL,AGRN,AHCYL1,AHDC1,AJAP1,AK5,AKNAD1,AKR1A1,AKR7A2,AKT1S1,AKT2,ALAS1,ALDH16A1,ALDH4A1,ALG6,ALKBH6,ALPL,ALX3,AMPD1,AMPD2,AMY2A,AMY2B,ANGPTL7,ANKRD13C,ANKRD27,ANKRD65,ANXA7,AP2A1,AP3M1,AP4B1,APLP1,APOC1,APOE,ARHGAP33,ARHGAP35,ARHGEF1,ARHGEF10L,ARHGEF16,ARID1A,ARMH1,ASAP3,AS…	1317
Cell-To-Cell Signaling and Interaction,Embryonic Development	Adhesion of embryonic cells	0.00628		-1.706	CEACAM16,EPHA8,KLK6,NPHS1,PLAU,PLAUR,PTGER3,RRAS,UTS2,VCAM1	10
Cancer,Organismal Injury and Abnormalities	Frequency of tumor	0.00669		-0.362	AADACL3,ABCA4,ABCD3,ACADM,ACAP3,ACOT7,ACTN4,ACTRT2,ADAM30,ADK,ADORA3,AGAP5 (includes others),AGBL4,AGL,AGO1,AGRN,AHCYL1,AHDC1,AJAP1,AK2,AK5,AKR1A1,AKR7A2,AKT2,ALAS1,ALDH16A1,ALDH4A1,ALKBH6,ALPL,ALX3,AMPD1,AMPD2,AMY2A,AMY2B,ANGPTL3,ANKRD27,ANXA7,AP2A1,AP4B1,APLP1,APOE,ARHGAP29,ARHGAP33,ARHGAP35,ARHGEF1,ARHGEF10L,ARHGEF16,ARID1A,ASAP3,ATAD3A,ATAD3B,ATG4C,ATP1A1,ATP4A,ATP5IF1,AUNIP,AURKC,AXL,B3GALT6…	1061
Cell Morphology,Cellular Function and Maintenance	Autophagy of sarcoma cell lines	0.00715	Decreased	-2.621	BAX,BBC3,CAPNS1,mir-506,mir-515,PINK1,TP73	7
Cell Death and Survival	Apoptosis of antigen presenting cells	0.00863		0.053	AXL,CSF1,GBP1,IFNL1,IRF3,LILRB1,NGF,OSCAR,TGFB1,TLR9	10
RNA Post-Transcriptional Modification	Processing of mRNA	0.00983		1.109	AHCYL1,BCAS2,CDK11A,CDK11B,DNAJC8,ELAVL4,ERCC2,GEMIN7,HNRNPL,HNRNPR,HNRNPUL1,KHDRBS1,MAGOH,PAF1,POLR2I,PPIE,PPIH,PRPF31,RBM15,RNPC3,SF3A3,SFPQ,SNIP1,SNRNP40,SNRNP70,SNRPA,SNRPD2,SRRM1,SRSF10,SRSF11,SRSF4,SSU72,SUPT5H,SYF2,SYMPK,THRAP3,U2AF1L4,U2AF2,YBX1	39
RNA Post-Transcriptional Modification	Processing of RNA	0.00993		-0.426	AHCYL1,BCAS2,CDK11A,CDK11B,DDX20,DNAJC8,ELAVL4,EPB41,ERCC2,EXOSC10,EXOSC5,FBL,GEMIN7,HNRNPL,HNRNPR,HNRNPUL1,INTS11,KHDRBS1,MAGOH,NOL9,PABPC4,PAF1,POLR2I,PPIE,PPIH,PRPF31,RBM15,RNPC3,RPL11,RPL5,RPS16,RPS19,RPS9,SARS1,SF3A3,SFPQ,SNIP1,SNRNP40,SNRNP70,SNRPA,SNRPD2,SRRM1,SRSF10,SRSF11,SRSF4,SSU72,SUPT5H,SYF2,SYMPK,TARDBP,THRAP3,U2AF1L4,U2AF2,UTP11,WDR3,YBX1,ZNF326	57
Cell Death and Survival	Cell death of phagocytes	0.0125		-0.273	ADORA3,AXL,CSF1,FCAR,GBP1,IFNL1,IRF3,LEPR,LILRB1,NGF,OSCAR,PIK3CD,SIGLEC9,TGFB1,TLR9,TNFRSF1B,TNFRSF9	17
Carbohydrate Metabolism,Cellular Function and Maintenance,Molecular Transport,Small Molecule Biochemistry	Transport of D-glucose	0.0127		-0.625	AKT2,C5AR2,FGF21,GSK3A,PRKCZ,RAB4B,RSC1A1,SLC2A1,SLC2A5,SLC45A1,SORT1	11
Cardiovascular Disease,Cardiovascular System Development and Function,Cell Morphology,Cellular Function and Maintenance,Organismal Injury and Abnormalities,Tissue Morphology	Permeability of microvascular endothelial cells	0.0134		-1	CYTH2,PLAU,PROK1,VASP	4
Cell-To-Cell Signaling and Interaction,Inflammatory Response	Immune response of T lymphocytes	0.0147		0.728	APOE,BAX,KLK3,LILRB1,LILRB2,mir-34	6
Cancer,Organismal Injury and Abnormalities	Development of malignant tumor	0.0151		-0.362	AADACL3,ABCA4,ABCD3,ACADM,ACAP3,ACOT7,ACTN4,ACTRT2,ADAM30,ADK,ADORA3,AGAP5 (includes others),AGBL4,AGL,AGO1,AGRN,AHCYL1,AHDC1,AJAP1,AK2,AK5,AKR1A1,AKR7A2,AKT2,ALAS1,ALDH16A1,ALDH4A1,ALKBH6,ALPL,ALX3,AMPD1,AMPD2,AMY2A,AMY2B,ANGPTL3,ANKRD27,AP2A1,AP4B1,APLP1,APOE,ARHGAP29,ARHGAP33,ARHGAP35,ARHGEF1,ARHGEF10L,ARHGEF16,ARID1A,ASAP3,ATAD3A,ATAD3B,ATG4C,ATP4A,ATP5IF1,AUNIP,AURKC,AXL,B3GALT6,B3GNT8,B4GAL…	1045
Carbohydrate Metabolism,Molecular Transport	Transport of carbohydrate	0.0153		-1.792	AKT2,C5AR2,FGF21,GSK3A,MFSD2A,PRKCZ,RAB4B,RSC1A1,SLC16A1,SLC25A33,SLC2A1,SLC2A5,SLC35A3,SLC45A1,SORT1,STX12	16
Cellular Movement	Invasion of cervical cancer cell lines	0.0161		-1.969	ACTN4,AJAP1,AXL,MZF1,SPHK2,SRRM1,ZNF350	7
Carbohydrate Metabolism,Molecular Transport	Transport of monosaccharide	0.0168		-1.347	AKT2,C5AR2,FGF21,GSK3A,PRKCZ,RAB4B,RSC1A1,SLC16A1,SLC2A1,SLC2A5,SLC45A1,SORT1	12
Cell Death and Survival	Cell death of antigen presenting cells	0.0183		0.422	AXL,CSF1,GBP1,IFNL1,IRF3,LILRB1,NGF,OSCAR,TGFB1,TLR9,TNFRSF1B	11
Lipid Metabolism,Small Molecule Biochemistry	Hydrolysis of fatty acid	0.0186		-1.941	ACOT11,LIPE,PLA2G2A,PLA2G4C	4
Cellular Development,Cellular Growth and Proliferation,Hematological System Development and Function,Lymphoid Tissue Structure and Development	Proliferation of mononuclear leukocytes	0.0191		-0.421	APOE,CD2,CD33,CD37,CEACAM1,CLC,CLEC11A,CSF1,CTPS1,EPHB2,FLT3LG,FTL,GLMN,IFNL2,IL23R,IL4I1,ISG15,KCNA3,KCNN4,KIR2DS4 (includes others),KLK8,LAIR1,LGALS4,LILRB1,LILRB2,LILRB4,MFN2,mir-30,MTOR,PIK3CD,TCIRG1,TGFB1,TLR9,TNFRSF14,TNFRSF1B,TNFRSF4,TNFRSF9,TXLNA,TYROBP,VAV3,VCAM1,VTCN1	42
Infectious Diseases	Infection of carcinoma cell lines	0.022		-0.928	AXL,CROCC,FCGRT,HDAC1,IFNL1,PAF1	6
Cell-To-Cell Signaling and Interaction,Hematological System Development and Function,Immune Cell Trafficking,Inflammatory Response	Activation of T lymphocytes	0.0256		-0.86	CD2,CD58,CEACAM5,CEACAM6,CLC,DDOST,FLT3LG,KIR3DL1,LCK,LILRB1,LILRB2,PIK3CD,PLA2G2A,PPP3CB,PTPN22,TGFB1,TLR9,VTCN1	18
Cell-To-Cell Signaling and Interaction,Renal and Urological System Development and Function	Adhesion of kidney cells	0.0257		-0.867	CEACAM16,EPHA8,KLK6,MTOR,NPHS1,PLAU,PLAUR,PTGER3,RRAS,TGFB1,UTS2	11
Infectious Diseases	Replication of Hepatitis C virus	0.0257		0.541	AGO1,AGO3,AGO4,IFNL1,IFNL2,IFNL3,IFNL4,ISG15,PINK1,YBX1,ZC3H12A	11
Cell Death and Survival	Apoptosis of dendritic cells	0.0265		-0.128	AXL,IFNL1,LILRB1,OSCAR,TGFB1,TLR9	6
Cell Death and Survival	Apoptosis of leukocytes	0.0274		-0.781	ADORA3,AXL,BAX,CASP9,CLC,CSF1,FCAR,GBP1,IFNL1,IRF3,LEPR,LGALS4,LILRB1,MAP4K1,MTOR,NGF,NOC2L,OSCAR,PIK3CD,PPP5C,SIGLEC8,SIGLEC9,TGFB1,TLR9,TNFRSF1B,TNFRSF25,TNFRSF8,TNFRSF9,VAV3	29
Cell Death and Survival,Cellular Compromise	Cytotoxicity of natural killer cells	0.0283		0.857	CD2,CD58,CEACAM1,KIR2DL4,KIR2DS4 (includes others),KIR3DL1,LAIR1,NCR1,SIGLEC7,TGFB1	10
Cardiovascular System Development and Function,Cell Morphology,Cellular Development,Organismal Development,Tissue Development	Tubulation of endothelial cell lines	0.0293	Decreased	-2.158	CLIC4,EPHA2,mir-150,PATJ,PRKACB,PRKCG,RAP1A,S1PR1	8
Infectious Diseases,Respiratory Disease	Infection of lung cancer cell lines	0.0302		-0.6	AXL,CROCC,HDAC1,IFNL1,PAF1	5
Cellular Movement	Migration of synovial cells	0.0302	Decreased	-2.224	F3,PIK3CD,PLAU,S1PR1,TGFB1	5
Cell-mediated Immune Response,Cellular Development,Cellular Function and Maintenance,Cellular Growth and Proliferation,Embryonic Development,Hematological System Development and Function,Hematopoiesis,Lymphoid Tissue Structure and Development,Organ Development,Organismal Development,Tissue Development	Differentiation of regulatory T lymphocytes	0.0368	Decreased	-2.19	IFNL3,LILRB2,LILRB4,TGFB1,TNFRSF18	5
Cellular Development,Cellular Growth and Proliferation,Embryonic Development,Hematological System Development and Function,Hematopoiesis,Lymphoid Tissue Structure and Development,Organ Development,Organismal Development,Tissue Development	Colony formation of bone marrow cells	0.0371	Decreased	-2.429	CLEC11A,IL11,MPL,PPP1R12C,RPS19,TAL1	6
Cellular Movement	Migration of connective tissue cells	0.0389		-1.509	APOE,CSF1,F3,HAS1,PIK3CD,PLAU,PLAUR,S1PR1,TGFB1	9
Infectious Diseases	Infection by DNA virus	0.0397		-0.152	ADK,AKT2,CDC42,CSF1,CSF3R,FCGR1B,IL23R,IRF3,MAG,mir-10,mir-30,mir-515,mir-602,mir-8,MTOR,OPRD1,POLD1,PPP3CB,TGFB1,TNFRSF4,TP73,UNC93B1	22
Cell Death and Survival	Cell death of dendritic cells	0.041		0.415	AXL,IFNL1,LILRB1,OSCAR,TGFB1,TLR9,TNFRSF1B	7
Cancer,Organismal Injury and Abnormalities	Genitourinary tumor	0.0425		-1.265	A1BG,AADACL3,AADACL4,ABCA4,ACADM,ACAP3,ACOT7,ACP7,ACTN4,ACTRT2,ADAM30,ADORA3,ADPRHL2,AGAP5 (includes others),AGBL4,AGL,AHCYL1,AHDC1,AJAP1,AK2,AK5,AKR1A1,AKR7A2,AKT2,ALAS1,ALDH16A1,ALDH4A1,ALKBH6,ALPL,AMIGO1,AMPD1,AMPD2,AMY2B,ANGPTL3,ANKRD27,AP2S1,AP4B1,APOE,ARHGAP29,ARHGAP35,ARHGEF1,ARHGEF10L,ARHGEF19,ARID1A,ARMH1,ASAP3,ASB17,ASCC1,ATAD3A,ATAD3B,ATAD3C,ATG4C,ATP13A2,ATP1A1,ATP1A3,ATP5IF1,ATXN7L2,…	1064
Cancer,Organismal Injury and Abnormalities	Urogenital cancer	0.0461		-0.478	A1BG,AADACL3,AADACL4,ABCA4,ACADM,ACAP3,ACOT7,ACP7,ACTN4,ACTRT2,ADAM30,ADORA3,ADPRHL2,AGAP5 (includes others),AGBL4,AGL,AHCYL1,AHDC1,AJAP1,AK2,AK5,AKR1A1,AKR7A2,AKT2,ALAS1,ALDH16A1,ALDH4A1,ALKBH6,ALPL,AMIGO1,AMPD1,AMPD2,AMY2B,ANGPTL3,ANKRD27,AP4B1,APOE,ARHGAP29,ARHGAP35,ARHGEF1,ARHGEF10L,ARHGEF19,ARID1A,ARMH1,ASAP3,ASB17,ASCC1,ATAD3A,ATAD3B,ATAD3C,ATG4C,ATP13A2,ATP1A1,ATP1A3,ATP5IF1,ATXN7L2,AXL,AZ…	1047
Cellular Development,Cellular Growth and Proliferation,Connective Tissue Development and Function,Hematological System Development and Function,Lymphoid Tissue Structure and Development,Tissue Development	Proliferation of peripheral blood lymphocytes	0.0467		0.509	IL4I1,MFN2,MTOR,TGFB1,TLR9,TYROBP,VTCN1	7
Cellular Development,Cellular Growth and Proliferation,Hematological System Development and Function,Lymphoid Tissue Structure and Development	Proliferation of lymphocytes	0.0484		-0.366	APOE,CD2,CD33,CD37,CEACAM1,CLC,CTPS1,EPHB2,FLT3LG,FTL,GLMN,IL23R,IL4I1,ISG15,KCNA3,KCNN4,KIR2DS4 (includes others),KLK8,LAIR1,LILRB1,LILRB2,LILRB4,MFN2,mir-30,MTOR,PIK3CD,TCIRG1,TGFB1,TLR9,TNFRSF14,TNFRSF1B,TNFRSF4,TNFRSF9,TXLNA,TYROBP,VAV3,VCAM1,VTCN1	38
Cancer,Organismal Injury and Abnormalities	Malignant genitourinary solid tumor	0.0492		-0.478	A1BG,AADACL3,AADACL4,ABCA4,ACADM,ACAP3,ACOT7,ACP7,ACTN4,ACTRT2,ADAM30,ADORA3,ADPRHL2,AGAP5 (includes others),AGBL4,AGL,AHCYL1,AHDC1,AJAP1,AK2,AK5,AKR1A1,AKR7A2,AKT2,ALAS1,ALDH16A1,ALDH4A1,ALKBH6,ALPL,AMIGO1,AMPD1,AMPD2,AMY2B,ANGPTL3,ANKRD27,AP4B1,APOE,ARHGAP29,ARHGAP35,ARHGEF1,ARHGEF10L,ARHGEF19,ARID1A,ARMH1,ASAP3,ASB17,ASCC1,ATAD3A,ATAD3B,ATAD3C,ATG4C,ATP13A2,ATP1A1,ATP1A3,ATP5IF1,ATXN7L2,AXL,AZ…	1046
GBM CNA-preserved
Cellular Movement	Migration of lung cancer cell lines	2.82e-05		0.334	ACTA2,BRAF,CDKN2A,CXCL12,EGFR,EPHB6,HGF,HNRNPA2B1,HOTTIP,HOXA11-AS,ITGB1,mir-148,mir-182,mir-183,mir-96,NRP1,PODXL,PTN,RAC1,SFTPD,SMO,TWIST1	22
Cellular Movement	Migration of carcinoma cell lines	3.05e-05		0.438	ACTA2,BRAF,C1GALT1,CXCL12,EGFR,EPHB6,FGF8,GNAI1,HGF,HIF1AN,HNRNPA2B1,HOTTIP,HOXA-AS2,HOXA11-AS,HOXA4,IFIT2,IGF2BP3,IL6,ITGB1,LEP,mir-148,mir-182,mir-183,mir-96,NRP1,PODXL,PTEN,PTN,RAC1,SFRP4,SFTPD,SMO,TWIST1,ZYX	34
Small Molecule Biochemistry	Hydroxylation of dapsone	3.64e-05	Decreased	-2	CYP2C18,CYP2C19,CYP2C8,CYP2C9	4
Cellular Development,Embryonic Development,Organismal Development	Differentiation of embryonic cells	7.53e-05		-1.546	CDK1,CHCHD2,EZH2,FGFR2,GLI3,IL6,INHBA,MACROH2A2,mir-153,mir-196,NODAL,SIRT1,SMO,TET1,TRIM24	15
Cellular Assembly and Organization	Aggregation of vesicles	0.000105		-0.775	ANXA7,SFTPA1,SMO,SRI	4
Cellular Movement	Cell movement of carcinoma cell lines	0.000116		0.62	ACTA2,BRAF,C1GALT1,CDK14,CXCL12,EGFR,EPHB6,FGF8,GNAI1,HGF,HIF1AN,HNRNPA2B1,HOTTIP,HOXA-AS2,HOXA11-AS,HOXA4,IFIT2,IGF2BP3,IL6,ITGB1,LEP,mir-148,mir-182,mir-183,mir-96,NRP1,PODXL,PTEN,PTN,RAC1,SFRP4,SFTPD,SMO,TWIST1,ZEB1,ZYX	36
Cellular Movement	Cell movement of lung cancer cell lines	0.000122		0.318	ACTA2,BRAF,CDKN2A,CXCL12,EGFR,EPHB6,HGF,HNRNPA2B1,HOTTIP,HOXA11-AS,ITGB1,mir-148,mir-182,mir-183,mir-96,NRP1,PODXL,PTN,RAC1,SFTPD,SMO,TWIST1,ZYX	23
Cellular Development,Cellular Growth and Proliferation	Cell proliferation of carcinoma cell lines	0.000129		0.658	ABCC2,BMPR1A,BRAF,C1GALT1,CASP2,CDK14,CDKN2A,CXCL12,DKK1,DLX6-AS1,EGFR,EPHA1,ETV1,EZH2,FAS,FGF8,FGFR2,FSCN1,FZD9,HGF,HIF1AN,HK1,HNRNPA2B1,HOTTIP,HOXA-AS2,HOXA1,HOXA11-AS,HOXA13,IGF2BP3,IGFBP3,INHBA,ITGB1,ITGB8,LEP,MAPK8,mir-103,mir-146,mir-183,mir-29,mir-346,mir-489,NODAL,NRP1,PTEN,PTN,RAC1,RET,SAMD9L,SCD,SFTPD,SMO,TBXAS1,TFPI2,TWIST1,UPP1,ZEB1,ZNF267	57
Cell-To-Cell Signaling and Interaction	Adhesion of carcinoma cell lines	0.000226		0.824	CXCL12,EGFR,EPHB6,HOXA4,ITGB1,RAC1,SFRP4,ZEB1,ZYX	9
Cell-To-Cell Signaling and Interaction	Integrity of intercellular junctions	0.000234		-0.762	GDF2,HGF,RAC1,VCL	4
Cellular Development,Cellular Growth and Proliferation	Expansion of tumor cell lines	0.000359		1.307	mir-29,PTEN,SBDS,SHH,SMO	5
Cell-To-Cell Signaling and Interaction	Binding of carcinoma cell lines	0.000605		0.824	CXCL12,EGFR,EPHB6,HGF,HOXA4,ITGB1,RAC1,SFRP4,ZEB1,ZYX	10
Cellular Development	Differentiation of stem cells	0.00066		-1.676	CDK1,CHCHD2,EZH2,FGF8,FGFR2,GLI3,IL6,MACROH2A2,mir-153,mir-196,SHH,SIRT1,SMO,TRIM24	14
Cell-To-Cell Signaling and Interaction,Cellular Assembly and Organization	Cell-cell contact of tumor cell lines	0.00069		-0.15	ATE1,CTNNA3,HGF,HOXA4,ITGB1,LEP,PARD3,SIRT1,TRPV6,ZEB1,ZYX	11
Cellular Movement	Migration of myeloma cell lines	0.000768		0.166	CXCL12,HGF,ITGB1,PPIA,RALA	5
Cellular Movement	Cell movement of pancreatic cancer cell lines	0.000825		0.807	CXCL12,EGFR,FGFR2,FSCN1,HGF,IL6,ITGB1,MAPK8,mir-96,PLAU,PPIF,RAC1	12
Cell Death and Survival	Anoikis	0.00138		-1.596	AHR,BRAF,CDKN2A,CYP26A1,EGFR,FAS,HGF,HTRA1,ITGB1,PLAU,PTEN,TWIST1,ZEB1	13
Cellular Movement,Hematological System Development and Function,Immune Cell Trafficking	Transmigration of peripheral blood leukocytes	0.00145		-0.18	CXCL12,ITGB1,TSPAN14,TSPAN15,TSPAN33	5
Cellular Movement	Migration of melanoma cell lines	0.00157		0.331	BRAF,CD36,CDKN2A,CXCL12,DNAJB6,EGFR,GRM3,HGF,HNRNPA2B1,ITGB1,mir-148,mir-335,NRP1,RAC1,SEMA3A	15
Cellular Movement	Invasion of carcinoma cell lines	0.00163		1.959	ACTA2,BRAF,C1GALT1,CDK14,CXCL12,DKK1,EGFR,EZH2,FGF8,FGFR2,FSCN1,GNAI1,HGF,HOTTIP,HOXA11-AS,HTRA1,IFIT2,IGF2BP3,IL6,ITGB1,LEP,mir-182,mir-183,mir-96,RAC1,RALA,SFTPD,SMO,TWIST1	29
Carbohydrate Metabolism,Cellular Function and Maintenance	Glycolysis of tumor cell lines	0.00186		1.947	CISD1,CXCL12,EGFR,IL6,MLXIPL,OGA,PDK4,TNKS2	8
Cellular Development,Embryonic Development,Organismal Development,Tissue Development	Differentiation of embryonic tissue	0.00223		-1.369	CDK1,CHCHD2,EZH2,FGF8,FGFR2,INHBA,mir-196,NODAL,SHH,SIRT1,TET1	11
Cellular Movement	Invasion of lung cancer cell lines	0.00234		0.724	ACTA2,CXCL12,DKK1,EGFR,HGF,HOXA11-AS,IL6,ITGB1,mir-182,mir-183,mir-96,PTEN,RAC1,RALA,SFTPD,SMO,TWIST1	17
Cellular Development,Cellular Growth and Proliferation	Proliferation of prostate cancer cell lines	0.00251	Increased	2.47	AGK,ANXA7,CASP7,CDK6,CDKN2A,CREM,EGFR,ENTPD1,ETV1,EZH2,FGF8,FSCN1,HELLS,HGF,HK1,IGFBP1,IGFBP3,IL6,INHBA,ITGB1,LEP,mir-148,mir-29,mir-96,NCOA4,PDCD4,PDK4,PTEN,PTN,RAC1,SMO,SND1,STEAP2,TACC2,TARP,TFPI2,TWIST1,ZMIZ2	38
Cellular Movement	Migration of tumor cell lines	0.00254		1.777	ACTA2,AGK,AHR,ATE1,BRAF,C1GALT1,CALD1,CALU,CD36,CDCA7L,CDKN2A,CHN2,CLDN4,CXCL12,DBF4,DNAJB6,DUSP5,EGFR,ELMO1,EPHB6,EZH2,FGF8,FGFR2,FLNC,FSCN1,GNA12,GNAI1,GRM3,HGF,HHEX,HIF1AN,HNRNPA2B1,HOTAIRM1,HOTTIP,HOXA-AS2,HOXA-AS3,HOXA1,HOXA11,HOXA11-AS,HOXA4,HTRA1,IFIT2,IGF2BP3,IGFBP1,IGFBP3,IL6,IRF5,ITGB1,LEP,MAD1L1,MAP3K8,MAPK8,mir-148,mir-182,mir-183,mir-335,mir-346,mir-96,NANOS1,NRF1,NRP1,PAX4,PDCD4,PDL…	90
Cell-To-Cell Signaling and Interaction,Cellular Assembly and Organization	Cell-cell contact of breast cancer cell lines	0.00268		0.08	ATE1,ITGB1,LEP,ZEB1	4
Cell-To-Cell Signaling and Interaction,Cellular Assembly and Organization	Cell-cell adhesion of tumor cell lines	0.00274		-0.032	CTNNA3,HGF,HOXA4,ITGB1,LEP,PARD3,SIRT1,ZEB1,ZYX	9
Cellular Development,Cellular Growth and Proliferation	Proliferation of stem cells	0.00287		-0.479	ABCB1,CDKN2A,CXCL12,DKK1,FGFR2,IGFBP3,IL6,SHH	8
Cancer,Organismal Injury and Abnormalities	Non-hematological solid tumor	0.00291		1.111	A1CF,ABCA13,ABCB1,ABCB4,ABCB5,ABCC2,ABHD11,ABLIM1,ACSM6,ACTA2,ACTB,ACTR1A,ACTR3B,ADAM22,ADCK2,ADCY1,ADCYAP1R1,ADD3,ADIRF,ADK,ADO,ADRA2A,ADRB1,AFAP1L2,AGAP5 (includes others),AGBL3,AGK,AGMO,AGR2,AGR3,AHCYL2,AHR,AIFM2,AKAP9,AKR1B1,AKR1B10,AKR1B15,AKR1D1,ALDH18A1,ALOX5,AMPH,AMZ1,ANAPC16,ANK3,ANKIB1,ANKMY2,ANKRD1,ANKRD2,ANKRD22,ANLN,ANXA11,ANXA7,ANXA8/ANXA8L1,AOAH,AP3M1,AP5Z1,AQP1,ARF5,ARHGAP12,ARHGA…	968
Cell Death and Survival	Cell viability of lung cancer cell lines	0.00307		0.879	AGR2,BAG3,BRAF,EGFR,EIF3A,EZH2,FGFR2,HGF,HK1,IL6,KIF11,mir-148,NFKB2,NRF1,NRP1,PARG,SMO,TWIST1	18
Cellular Movement	Cell movement of prostate cancer cell lines	0.00307	Increased	2.005	AGK,AGR2,CXCL12,DBF4,EGFR,FSCN1,HGF,HHEX,IL6,ITGB1,PTN,RAC1,SIRT1,SND1,TBXAS1,TCAF1,TCAF2,TWIST1	18
Cell Death and Survival	Activation-induced cell death of tumor cell lines	0.00318		-0.152	FAS,ITGB1,mir-146,NRP1,RAC1	5
Tissue Development	Growth of epithelial tissue	0.0034		0.864	BMPER,BRAF,CD36,CDK6,CDKN2A,CDKN2B,CXCL12,DKK1,EGFR,EZH2,FGFR2,FZD8,GDF2,HGF,HIF1AN,HIPK2,IGFBP1,IL6,INHBA,ITGB1,ITGB8,KRIT1,LEP,mir-129,mir-146,mir-148,mir-29,MYOF,NODAL,NRP1,PAX2,PBLD,PLXNA4,PPIA,PTEN,PTN,SIRT1,SMO	38
Embryonic Development,Organismal Development	Development of body trunk	0.00349		0.387	AKAP9,ANKRD1,ARID5B,C1GALT1,CDKN2B,CYCS,EGFR,EZH2,HGF,IGFBP1,INHBA,ITGB1,LEP,MYOZ1,MYPN,PAX4,PLCE1,PTEN,RBM20,RET,SFTPD,SYNPO2L,TBX20,TWIST1,ZEB1	25
Cell Death and Survival	Apoptosis of hepatoma cell lines	0.00354		-0.665	ANKRD1,CDKN2A,CXCL12,EGFR,FAS,FGFR2,GDF2,GIMAP6,IL6,INHBA,IRF5,KIF11,LANCL2,MAPK8,mir-183,mir-29,PTEN,RAC1,SCD,SIRT1	20
Cancer,Organismal Injury and Abnormalities	Cancer of cells	0.00359		0.218	ABCA13,ABCB1,ABCB4,ACSM6,ACTA2,ADAM22,ADCK2,ADCY1,ADCYAP1R1,ADD3,ADRB1,AFAP1L2,AGAP5 (includes others),AHR,AKAP9,ALOX5,AMPH,ANK3,ANKIB1,ANLN,ANXA11,AOAH,AQP1,ARHGEF35,ARID5B,AS3MT,ASCC1,ATP6V0E2,ATRNL1,AUTS2,BBS9,BICC1,BLVRA,BMPER,BMPR1A,BRAF,BUD23,BZW2,C10orf71,C1GALT1,CALCR,CALD1,CALHM2,CALHM3,CAMK2B,CARD11,CASD1,CASP2,CASP7,CCAR1,CCDC126,CCDC172,CCDC7,CCNJ,CD36,CDK1,CDK6,CDKN2A,CDKN2B,CEP41,CH…	373
Cancer,Cell Death and Survival,Organismal Injury and Abnormalities,Tumor Morphology	Cell death of myeloma cells	0.00371		-1.067	FAS,IL6,INHBA,SHH	4
Cell Morphology	Polarization of tumor cell lines	0.00382		-1.387	BRAF,CXCL12,GNA12,ITGB1,PDLIM1,PRKG1,RAC1	7
Cellular Development,Cellular Growth and Proliferation	Colony formation of pancreatic cancer cell lines	0.004		1.406	CDKN2A,CDKN2B,CLDN4,PTN,SNHG15	5
Cancer,Organismal Injury and Abnormalities	Nonhematologic malignant neoplasm	0.00413		1.19	A1CF,ABCA13,ABCB1,ABCB4,ABCB5,ABCC2,ABHD11,ABLIM1,ACSM6,ACTA2,ACTB,ACTR1A,ACTR3B,ADAM22,ADCK2,ADCY1,ADCYAP1R1,ADD3,ADIRF,ADK,ADO,ADRA2A,ADRB1,AFAP1L2,AGAP5 (includes others),AGBL3,AGK,AGMO,AGR2,AGR3,AHCYL2,AHR,AIFM2,AKAP9,AKR1B1,AKR1B10,AKR1B15,AKR1D1,ALDH18A1,ALOX5,AMPH,AMZ1,ANAPC16,ANK3,ANKIB1,ANKMY2,ANKRD1,ANKRD2,ANKRD22,ANLN,ANXA11,ANXA7,ANXA8/ANXA8L1,AOAH,AP3M1,AP5Z1,AQP1,ARF5,ARHGAP12,ARHGA…	964
Lipid Metabolism,Molecular Transport,Small Molecule Biochemistry	Concentration of phospholipid	0.00445		0.396	ABCB4,AKR1B10,CXCL12,EZH2,FAS,HGF,INSIG1,NRBF2,PTEN,PTPRN2,SCD,SGMS1	12
Carbohydrate Metabolism	Glycolysis of cells	0.00453		1.977	CISD1,CXCL12,ECD,EGFR,GCK,IL6,MLXIPL,NUP205,NUP42,OGA,PDK4,PGAM1,POM121/POM121C,TNKS2	14
Gastrointestinal Disease,Hepatic System Disease,Organismal Injury and Abnormalities	Liver lesion	0.00468		-0.036	A1CF,ABCA13,ABCB4,ABCB5,ABCC2,ABLIM1,ACTA2,ACTB,ACTR1A,ACTR3B,ADCY1,ADK,ADRA2A,ADRB1,AGAP5 (includes others),AGK,AIFM2,AKAP9,AKR1B10,AKR1B15,AKR1D1,AMPH,ANAPC16,ANK3,ANKIB1,ANLN,AOAH,AP5Z1,AQP1,ARHGAP12,ARHGAP22,ARID5B,ASAH2,ASB4,ATAD1,ATE1,ATP6V0A4,AUTS2,AVL9,BAZ1B,BICC1,BLNK,BLVRA,BMPR1A,BRAF,BRAT1,BTAF1,BUD23,C10orf71,C1GALT1,C7orf25,C7orf31,C7orf33,C7orf57,CABCOCO1,CACNA2D1,CALHM1,CALHM3,CALN…	441
Cell Signaling,DNA Replication, Recombination, and Repair,Nucleic Acid Metabolism,Small Molecule Biochemistry	Hydrolysis of GTP	0.00495		-1.387	ANXA7,CDK1,ENTPD7,RGS10,SNX13	5
Cellular Movement	Migration of breast cancer cell lines	0.00499		1.017	AHR,ATE1,CHN2,CXCL12,DBF4,DNAJB6,DUSP5,EGFR,EZH2,FGFR2,HGF,HHEX,HOTTIP,HOXA11,IGFBP1,IGFBP3,IL6,ITGB1,LEP,MAD1L1,NRF1,NRP1,PAX4,PDCD4,PDLIM1,PLAU,PTEN,RAC1,SEMA3A,SEMA3C,SSBP1,TWIST1,ZEB1	33
Cell Death and Survival	Cell viability of carcinoma cell lines	0.00501		1.328	BAG3,BRAF,C1GALT1,CPA1,DNAJB6,EGFR,EIF3A,EZH2,FGFR2,HGF,HK1,IL6,KIF11,mir-146,mir-148,NRF1,NRP1,PARG,PTN,SMO,TWIST1	21
Cellular Movement	Cell movement	0.00516		1.176	ACTA2,ACTB,ADRA2A,AGK,AGR2,AHR,AKAP9,ARHGAP19,ARMS2,ATE1,BRAF,C10orf99,C1GALT1,CALD1,CALU,CCAR1,CD36,CDCA7L,CDK1,CDK14,CDK6,CDKN2A,CDKN2B-AS1,CHN2,CLDN3,CLDN4,COL17A1,COL1A2,CUL1,CXCL12,DBF4,DKK1,DLG5,DNAH11,DNAJB6,DUSP5,EGFR,EIF3A,ELMO1,EPHA1,EPHB6,ETV1,EZH2,FAS,FFAR4,FGF8,FGFR2,FLNC,FSCN1,GBF1,GDF2,GNA12,GNAI1,GPNMB,GRM3,HGF,HHEX,HIF1AN,HNRNPA2B1,HOTAIRM1,HOTTIP,HOXA-AS2,HOXA-AS3,HOXA1,HOXA11,H…	151
Cellular Movement	Migration of prostate cancer cell lines	0.00526		1.557	AGK,CXCL12,DBF4,EGFR,FSCN1,HGF,HHEX,IL6,ITGB1,PTN,RAC1,SIRT1,SND1,TCAF1,TCAF2,TWIST1	16
Cell Cycle,Cellular Movement	Cytokinesis of cervical cancer cell lines	0.00544		-0.707	AKAP9,ANLN,CEP55,GNAI1,KIF20B,MLXIPL,RAC1,SEPTIN7,SVIL	9
Cell Death and Survival	Apoptosis of colorectal cancer cell lines	0.00556		-1.335	AKR1B10,BAG3,BRAF,CASP2,CBX3,CCAR1,CDK1,CDKN2A,CHUK,CREM,CYCS,EGFR,FAS,HGF,HIPK2,HOXA-AS2,HOXA5,IGFBP3,IRF5,ITGB1,LEP,MAPK8,MARCHF5,mir-148,mir-605,PPIA,PRKG1,RAC1,SIRT1,SRI	30
Cell-To-Cell Signaling and Interaction,Tissue Development	Adhesion of extracellular matrix	0.00574		-1	CDKN2A,COL13A1,COL17A1,CXCL12,HOXA7,ITGB1,mir-29,SGCE,SORBS1,VCL	10
Cell Death and Survival	Cell viability of squamous cell carcinoma cell lines	0.00582		1.034	C1GALT1,CPA1,DNAJB6,EGFR,HGF,KIF11	6
Cellular Development,Embryonic Development,Organismal Development	Differentiation of embryonic stem cells	0.00582		-0.6	GLI3,IL6,MACROH2A2,mir-153,SMO,TRIM24	6
Cell-To-Cell Signaling and Interaction,Connective Tissue Development and Function	Adhesion of fibroblasts	0.00606		-1.21	CXCL12,ITGB1,mir-183,PLAU,VCL	5
Cellular Movement	Cell movement of tumor cell lines	0.00628		1.846	ACTA2,AGK,AGR2,AHR,ATE1,BRAF,C1GALT1,CALD1,CALU,CD36,CDCA7L,CDK14,CDKN2A,CHN2,CLDN3,CLDN4,CXCL12,DBF4,DNAJB6,DUSP5,EGFR,EIF3A,ELMO1,EPHB6,EZH2,FFAR4,FGF8,FGFR2,FLNC,FSCN1,GNA12,GNAI1,GRM3,HGF,HHEX,HIF1AN,HNRNPA2B1,HOTAIRM1,HOTTIP,HOXA-AS2,HOXA-AS3,HOXA1,HOXA11,HOXA11-AS,HOXA4,HTRA1,IFIT2,IGF2BP3,IGFBP1,IGFBP3,IL6,IRF5,ITGB1,LEP,MAD1L1,MAP3K8,MAPK8,mir-148,mir-182,mir-183,mir-335,mir-346,mir-96,NA…	100
Cellular Movement	Migration of cells	0.00633		1.321	ACTA2,ADRA2A,AGK,AHR,AKAP9,ARMS2,ATE1,BRAF,C10orf99,C1GALT1,CALD1,CALU,CCAR1,CD36,CDCA7L,CDK1,CDK6,CDKN2A,CDKN2B-AS1,CHN2,CLDN4,COL17A1,COL1A2,CUL1,CXCL12,DBF4,DKK1,DLG5,DNAJB6,DUSP5,EGFR,ELMO1,EPHA1,EPHB6,ETV1,EZH2,FAS,FGF8,FGFR2,FLNC,FSCN1,GBF1,GDF2,GNA12,GNAI1,GPNMB,GRM3,HGF,HHEX,HIF1AN,HNRNPA2B1,HOTAIRM1,HOTTIP,HOXA-AS2,HOXA-AS3,HOXA1,HOXA11,HOXA11-AS,HOXA4,HOXA7,HOXA9,HTR7,HTRA1,IFIT2,IGF2BP…	136
Cellular Movement	Migration of pancreatic cancer cell lines	0.0067		0.934	FGFR2,FSCN1,HGF,IL6,ITGB1,mir-96,PLAU,PPIF,RAC1	9
Cell Death and Survival	Cell death of T lymphocytes	0.00689		-0.962	CASP7,CCAR1,CDK1,CDKN2A,CXCL12,ENTPD1,FAS,GIMAP5,IL6,MAPK8,NFKB2,PIP,RAC1	13
Cellular Development,Connective Tissue Development and Function,Skeletal and Muscular System Development and Function,Tissue Development	Differentiation of osteoblasts	0.00691		0.216	BMPER,BMPR1A,CDK1,CDK6,DKK1,EZH2,FGFR2,IL6,SUFU,TWIST1	10
Cell Morphology,Cellular Assembly and Organization,Cellular Development,Cellular Function and Maintenance,Cellular Growth and Proliferation	Formation of plasma membrane projections	0.00733		-1.154	HGF,ITGB1,KIF5B,RAC1,ZFYVE27	5
Cancer,Organismal Injury and Abnormalities	Solid tumor	0.00734		1.129	A1CF,ABCA13,ABCB1,ABCB4,ABCB5,ABCC2,ABHD11,ABLIM1,ACSM6,ACTA2,ACTB,ACTR1A,ACTR3B,ADAM22,ADCK2,ADCY1,ADCYAP1R1,ADD3,ADIRF,ADK,ADO,ADRA2A,ADRB1,AFAP1L2,AGAP5 (includes others),AGBL3,AGK,AGMO,AGR2,AGR3,AHCYL2,AHR,AIFM2,AIMP2,AKAP9,AKR1B1,AKR1B10,AKR1B15,AKR1D1,ALDH18A1,ALOX5,AMPH,AMZ1,ANAPC16,ANK3,ANKIB1,ANKMY2,ANKRD1,ANKRD2,ANKRD22,ANLN,ANXA11,ANXA7,ANXA8/ANXA8L1,AOAH,AOC1,AP3M1,AP5Z1,AQP1,ARF5,ARH…	987
Cellular Movement	Invasion of colorectal cancer cell lines	0.00781		-0.115	CXCL12,EGFR,FGFR2,FSCN1,HGF,HIPK2,LEP,NRP1,PDCD4,PDLIM1,PLAU,ZEB1	12
Cell Death and Survival	Activation-induced cell death	0.0079		0.246	FAS,IL6,ITGB1,mir-146,NRP1,RAC1	6
Cancer,Organismal Injury and Abnormalities	Carcinoma	0.00795		1.247	A1CF,ABCA13,ABCB1,ABCB4,ABCB5,ABCC2,ABHD11,ABLIM1,ACSM6,ACTA2,ACTB,ACTR1A,ACTR3B,ADAM22,ADCK2,ADCY1,ADCYAP1R1,ADD3,ADIRF,ADK,ADO,ADRA2A,ADRB1,AFAP1L2,AGAP5 (includes others),AGBL3,AGK,AGMO,AGR2,AHCYL2,AHR,AIFM2,AKAP9,AKR1B1,AKR1B10,AKR1B15,AKR1D1,ALDH18A1,ALOX5,AMPH,AMZ1,ANAPC16,ANK3,ANKIB1,ANKMY2,ANKRD1,ANKRD2,ANKRD22,ANLN,ANXA11,ANXA7,ANXA8/ANXA8L1,AOAH,AP3M1,AP5Z1,AQP1,ARF5,ARHGAP12,ARHGAP19,A…	947
Lipid Metabolism,Molecular Transport,Small Molecule Biochemistry	Concentration of lipid	0.00799		1.367	ABCB1,ABCB4,ADRA2A,AHR,AKR1B10,CALN1,CD36,CXCL12,EGFR,EZH2,FAS,HGF,INHBA,INSIG1,LEP,MLXIPL,NPC1L1,NRBF2,PON1,PON2,PTEN,PTPRN2,RAC1,SCD,SGMS1	25
Lipid Metabolism,Small Molecule Biochemistry,Vitamin and Mineral Metabolism	Metabolism of terpenoid	0.00803		-0.957	AKR1B1,AKR1B10,AKR1D1,CRHR2,CYP17A1,CYP26A1,CYP26C1,CYP2C18,CYP2C19,CYP2C8,CYP2C9,CYP51A1,GPAM,HGF,mir-182,mir-183,mir-96,NPC1L1,OPN1SW,RARRES2,RBP3,RBP4,SCD	23
Cancer,Neurological Disease,Organismal Injury and Abnormalities	Central nervous system solid tumor	0.00826		0.747	ABCA13,ACTR3B,ADRA2A,AGAP5 (includes others),AKAP9,ANLN,ANXA7,AOAH,ARID5B,BAG3,BMPR1A,BRAF,C7orf25,CALD1,CALN1,CARD11,CASP2,CCM2,CDCA7L,CDK6,CDKN2A,CDKN2B,CEP41,CNTNAP2,COBL,COL1A2,CPA5,CREB3L2,CSGALNACT2,CUEDC2,CXCL12,CYCS,CYP51A1,DEPP1,DNTT,DYDC2,EGFR,ELMO1,EPDR1,EPHA1,EPHB6,ETV1,EZH2,FAS,FERD3L,FGFR2,FKBP9,FLNC,FZD8,GBF1,GFRA1,GIMAP6,GLI3,GNAI1,GOT1,GPNMB,GPRIN2,GRK5,GRM3,HDAC9,HGF,HIPK2,HNRNP…	122
Cell Death and Survival	Cell death of hepatoma cell lines	0.00831		-0.689	ANKRD1,CDKN2A,CXCL12,DNAJB12,EGFR,FAS,FGFR2,GDF2,GIMAP6,IL6,INHBA,IRF5,KIF11,LANCL2,MAPK8,mir-183,mir-29,PTEN,RAC1,SCD,SIRT1	21
Cell Death and Survival	Mitochondrial cell death of tumor cell lines	0.00832		-0.261	CDK1,CDKN2A,FAS,SRI	4
Cellular Growth and Proliferation,Tissue Development	Proliferation of epithelial cells	0.0084		1.213	BRAF,CDK6,CDKN2A,CDKN2B,CXCL12,EGFR,EZH2,FGFR2,FZD8,HGF,IL6,INHBA,ITGB8,NODAL,PAX2,PBLD,PTEN,PTN	18
Cellular Movement	Invasion of pancreatic cancer cell lines	0.00858		-0.57	CLDN4,CXCL12,FGFR2,GFRA1,HGF,NRP1,PLAU	7
Cancer,Gastrointestinal Disease,Organismal Injury and Abnormalities	Digestive organ tumor	0.00869		1.411	A1CF,ABCA13,ABCB1,ABCB4,ABCB5,ABCC2,ABHD11,ABLIM1,ACSM6,ACTA2,ACTB,ACTR1A,ACTR3B,ADAM22,ADCY1,ADCYAP1R1,ADD3,ADIRF,ADK,ADRA2A,ADRB1,AFAP1L2,AGAP5 (includes others),AGBL3,AGK,AGMO,AGR2,AGR3,AHCYL2,AHR,AIFM2,AKAP9,AKR1B1,AKR1B10,AKR1B15,AKR1D1,ALDH18A1,ALOX5,AMPH,AMZ1,ANAPC16,ANK3,ANKIB1,ANKMY2,ANKRD22,ANLN,ANXA11,ANXA7,AOAH,AOC1,AP3M1,AP5Z1,AQP1,ARF5,ARHGAP12,ARHGAP19,ARHGAP22,ARHGEF5,ARID5B,ARMH3…	851
Cancer,Organismal Injury and Abnormalities	Malignant solid tumor	0.00875		1.777	A1CF,ABCA13,ABCB1,ABCB4,ABCB5,ABCC2,ABHD11,ABLIM1,ACSM6,ACTA2,ACTB,ACTR1A,ACTR3B,ADAM22,ADCK2,ADCY1,ADCYAP1R1,ADD3,ADIRF,ADK,ADO,ADRA2A,ADRB1,AFAP1L2,AGAP5 (includes others),AGBL3,AGK,AGMO,AGR2,AGR3,AHCYL2,AHR,AIFM2,AIMP2,AKAP9,AKR1B1,AKR1B10,AKR1B15,AKR1D1,ALDH18A1,ALOX5,AMPH,AMZ1,ANAPC16,ANK3,ANKIB1,ANKMY2,ANKRD1,ANKRD2,ANKRD22,ANLN,ANXA11,ANXA7,ANXA8/ANXA8L1,AOAH,AOC1,AP3M1,AP5Z1,AQP1,ARF5,ARH…	981
Cancer	Transformation of tumor cell lines	0.00912		1.067	AIMP2,DDIT4,DKK1,FGFR2,FZD9,RAC1	6
Cell-To-Cell Signaling and Interaction,Connective Tissue Development and Function	Binding of fibroblasts	0.00912		-1.48	CXCL12,IGFBP3,ITGB1,mir-183,PLAU,VCL	6
Cellular Movement	Invasion of epithelial cell lines	0.00968		1.609	EGFR,EZH2,FSCN1,IGF2BP3,IL6,PLAU,TWIST1	7
Cancer,Organismal Injury and Abnormalities	Tumorigenesis of tissue	0.00994		0.889	A1CF,ABCA13,ABCB1,ABCB4,ABCB5,ABCC2,ABHD11,ABLIM1,ACSM6,ACTA2,ACTB,ACTR1A,ACTR3B,ADAM22,ADCK2,ADCY1,ADCYAP1R1,ADD3,ADIRF,ADK,ADO,ADRA2A,ADRB1,AFAP1L2,AGAP5 (includes others),AGBL3,AGK,AGMO,AGR2,AGR3,AHCYL2,AHR,AIFM2,AKAP9,AKR1B1,AKR1B10,AKR1B15,AKR1D1,ALDH18A1,ALOX5,AMPH,AMZ1,ANAPC16,ANK3,ANKIB1,ANKMY2,ANKRD1,ANKRD2,ANKRD22,ANLN,ANXA11,ANXA7,ANXA8/ANXA8L1,AOAH,AP3M1,AP5Z1,AQP1,ARF5,ARHGAP12,ARHGA…	951
Lipid Metabolism,Small Molecule Biochemistry,Vitamin and Mineral Metabolism	Synthesis of steroid	0.0104		0.743	AKR1B15,AKR1D1,CALN1,CH25H,CREM,CRHR2,CYP17A1,CYP51A1,ETV1,GPAM,HGF,LEP,mir-182,mir-183,mir-96,NPC1L1,OSBPL3,SCD	18
Cellular Movement	Scattering of tumor cell lines	0.0104		0.494	EGFR,HGF,ITGB1,RAC1,RET	5
Cancer,Organismal Injury and Abnormalities	Neoplasia of cells	0.0111		0.072	A1CF,ABCA13,ABCB1,ABCB4,ABCC2,ACSM6,ACTA2,ACTB,ACTR3B,ADAM22,ADCK2,ADCY1,ADCYAP1R1,ADD3,ADRB1,AFAP1L2,AGAP5 (includes others),AGR3,AHR,AKAP9,ALOX5,AMPH,ANK3,ANKIB1,ANKRD22,ANLN,ANXA11,AOAH,AP3M1,AQP1,ARHGEF35,ARHGEF5,ARID5B,ARMS2,AS3MT,ASCC1,ATAD1,ATP6V0A4,ATP6V0E2,ATRNL1,AUTS2,BBS9,BICC1,BLVRA,BMPER,BMPR1A,BRAF,BUD23,BZW2,C10orf71,C1GALT1,CALCR,CALD1,CALHM2,CALHM3,CAMK2B,CARD11,CASD1,CASP2,CASP7…	436
Cellular Development,Cellular Growth and Proliferation	Cell proliferation of hepatoma cell lines	0.0111		0.555	AKR1B10,BMPR1A,C1GALT1,CDK14,CXCL12,EGFR,EPHA1,EZH2,FAS,FGFR2,GDF2,HGF,HOXA1,IL6,INHBA,LEP,mir-29,PEG10,PTEN,SIRT1,SMO,SNCG,SND1,TFPI2,ZNF267	25
Cell Death and Survival	Apoptosis of breast cancer cell lines	0.0113		-0.917	AHR,BAG3,CASP2,CASP7,CCAR1,CDK1,CDKN2A,CXCL12,CYCS,CYP26A1,DDIT4,EGFR,FAS,HDAC9,HGF,HOTTIP,HOXA1,HOXA11,HOXA5,IGFBP3,KIF11,MAPK8,MARCHF8,mir-148,NOD1,NRF1,NRP1,PDCD4,PTEN,RAC1,SND1,TRIM24,TWIST1	33
Cancer,Organismal Injury and Abnormalities	Non-melanoma solid tumor	0.0114		1.742	A1CF,ABCA13,ABCB1,ABCB4,ABCB5,ABCC2,ABHD11,ABLIM1,ACSM6,ACTA2,ACTB,ACTR1A,ACTR3B,ADAM22,ADCK2,ADCY1,ADCYAP1R1,ADD3,ADIRF,ADK,ADO,ADRA2A,ADRB1,AFAP1L2,AGAP5 (includes others),AGBL3,AGK,AGMO,AGR2,AGR3,AHCYL2,AHR,AIFM2,AKAP9,AKR1B1,AKR1B10,AKR1B15,AKR1D1,ALDH18A1,ALOX5,AMPH,AMZ1,ANAPC16,ANK3,ANKIB1,ANKMY2,ANKRD1,ANKRD2,ANKRD22,ANLN,ANXA11,ANXA7,ANXA8/ANXA8L1,AOAH,AP3M1,AP5Z1,AQP1,ARF5,ARHGAP12,ARHGA…	954
Cellular Development,Cellular Growth and Proliferation	Proliferation of lung cancer cell lines	0.0119		0.935	BRAF,CASP2,CDKN2A,CXCL12,DKK1,DUSP5,EGFR,ETV1,FZD9,HGF,HK1,HNRNPA2B1,HOTTIP,HOXA11-AS,HOXA13,IGFBP3,ITGB1,ITGB8,MAPK8,mir-103,mir-183,mir-29,NRP1,PTEN,PTN,RAC1,SAMD9L,SFTPD,SMO,TBXAS1,TWIST1,ZEB1	32
Free Radical Scavenging	Generation of reactive oxygen species	0.0119		1.987	CD36,DDIT4,FAS,HGF,ITGB1,MBL2,OGDH,PLAU,PPIA,PTEN,RAC1,SFTPD,TFAM	13
Cell-To-Cell Signaling and Interaction	PKB signaling	0.012		0.636	MAGI2,mir-29,PLEKHA1,PTEN,SFRP5,SIRT1	6
Cellular Development,Cellular Growth and Proliferation	Proliferation of skin cancer cell lines	0.012		0.6	CDKN2A,DDX21,EGFR,HGF,IL6,PAX2	6
Cell Death and Survival	Cell viability of breast cancer cell lines	0.012		0.361	AGR2,BAG3,CDKN2A,CPA1,EGFR,FGFR2,HGF,HHEX,HOXA5,IGF2BP3,IGFBP3,INSIG1,KIF11,mir-148,NRF1,NRP1,NT5C3A,PDCD4,PTEN,RET,SCD,SEM1,SHLD2,TWIST1	24
Cell Morphology,Cellular Movement	Cell spreading of blood cells	0.0122		-0.692	CD36,CXCL12,ITGB1,RAC1,SEMA3A	5
Cancer,Organismal Injury and Abnormalities	Development of neuroepithelial tumor	0.0125		0.747	ABCA13,ACTR3B,AGAP5 (includes others),AKAP9,ANLN,ANXA7,AOAH,ARID5B,BAG3,BMPR1A,BRAF,C7orf25,CALD1,CALN1,CASP2,CDKN2A,CDKN2B,CEP41,CNTNAP2,COBL,COL1A2,CPA5,CREB3L2,CSGALNACT2,CXCL12,CYCS,CYP51A1,DEPP1,DNTT,DYDC2,EGFR,ELMO1,EPDR1,EPHA1,EPHB6,ETV1,EZH2,FAS,FERD3L,FGFR2,FKBP9,FLNC,FZD8,GBF1,GFRA1,GIMAP6,GLI3,GOT1,GPNMB,GPRIN2,GRK5,GRM3,HGF,HIPK2,HNRNPA2B1,HOTAIRM1,HOXA-AS3,HOXA1,IDE,IL6,IRF5,ITGB8,KA…	106
Cancer,Organismal Injury and Abnormalities	Extracranial solid tumor	0.0127		0.09	A1CF,ABCA13,ABCB1,ABCB4,ABCB5,ABCC2,ABHD11,ABLIM1,ACSM6,ACTA2,ACTB,ACTR1A,ACTR3B,ADAM22,ADCK2,ADCY1,ADCYAP1R1,ADD3,ADIRF,ADK,ADO,ADRA2A,ADRB1,AFAP1L2,AGAP5 (includes others),AGBL3,AGK,AGMO,AGR2,AGR3,AHCYL2,AHR,AIFM2,AIMP2,AKAP9,AKR1B1,AKR1B10,AKR1B15,AKR1D1,ALDH18A1,ALOX5,AMPH,AMZ1,ANAPC16,ANK3,ANKIB1,ANKMY2,ANKRD1,ANKRD2,ANKRD22,ANLN,ANXA11,ANXA7,ANXA8/ANXA8L1,AOAH,AOC1,AP3M1,AP5Z1,AQP1,ARF5,ARH…	979
Cellular Movement	Cell movement of squamous cell carcinoma cell lines	0.0129		1.252	C1GALT1,CXCL12,EGFR,HGF,HIF1AN,HOTTIP,IFIT2,IL6,RAC1,ZEB1,ZYX	11
Lipid Metabolism,Small Molecule Biochemistry	Hydroxylation of lipid	0.0129		-1.981	CYP17A1,CYP26A1,CYP2C8,CYP2C9	4
Cellular Development,Cellular Growth and Proliferation,Reproductive System Development and Function	Cell proliferation of breast cell lines	0.0134		0.972	CCDC6,DMTF1,EGFR,EZH2,FGFR2,HGF,IGFBP3,KLHDC10,LEP,NFKB2,NRBF2,NUDT1,PDK4,PTEN,RAC1	15
Cell Death and Survival	Apoptosis of T lymphocytes	0.0138		-0.657	CASP7,CCAR1,CDKN2A,CXCL12,FAS,GIMAP5,IL6,MAPK8,NFKB2,PIP,RAC1	11
Carbohydrate Metabolism,Lipid Metabolism,Molecular Transport,Small Molecule Biochemistry	Concentration of phosphatidic acid	0.014		0.18	ABCB4,CXCL12,EZH2,FAS,INSIG1,NRBF2,PTEN,PTPRN2,SCD	9
Cellular Movement	Cell movement of ovarian cancer cell lines	0.014		0.945	CLDN3,CLDN4,EGFR,HGF,HNRNPA2B1,HOXA4,ITGB1,RAC1,SFRP4	9
Cancer,Neurological Disease,Organismal Injury and Abnormalities	Glioma	0.0143		0.747	ABCA13,ACTR3B,AGAP5 (includes others),AKAP9,ANLN,ANXA7,AOAH,ARID5B,BAG3,BMPR1A,BRAF,C7orf25,CALD1,CALN1,CASP2,CDKN2A,CDKN2B,CEP41,CNTNAP2,COBL,COL1A2,CPA5,CREB3L2,CSGALNACT2,CXCL12,CYCS,DEPP1,DNTT,DYDC2,EGFR,ELMO1,EPDR1,EPHA1,EPHB6,ETV1,EZH2,FAS,FERD3L,FGFR2,FKBP9,FLNC,FZD8,GBF1,GFRA1,GIMAP6,GLI3,GOT1,GPNMB,GPRIN2,GRK5,GRM3,HGF,HIPK2,HNRNPA2B1,HOTAIRM1,HOXA-AS3,HOXA1,IDE,IL6,IRF5,ITGB8,KAT6B,KCNM…	105
Carbohydrate Metabolism	Quantity of carbohydrate	0.015		-0.387	ABCB1,ABCB4,ADRA2A,CXCL12,DGKB,EZH2,FAS,GCK,INSIG1,NDST2,NRBF2,PON1,PTEN,PTPRN2,SCD	15
Cell Cycle	Mitogenesis of tumor cell lines	0.0154		1.664	CHN2,EGFR,HGF,IGFBP3,LEP,RAC1	6
Cellular Movement	Cell movement of breast cancer cell lines	0.0155		1.22	AHR,ATE1,CHN2,CXCL12,DBF4,DNAJB6,DUSP5,EGFR,EIF3A,EPHB6,EZH2,FGFR2,HGF,HHEX,HOTTIP,HOXA11,IGFBP1,IGFBP3,IL6,ITGB1,LEP,MAD1L1,NRF1,NRP1,PAX4,PDCD4,PDLIM1,PLAU,PTEN,RAC1,SEMA3A,SEMA3C,SSBP1,TWIST1,ZEB1	35
Cell-To-Cell Signaling and Interaction	Adhesion of dermal cells	0.0156		-0.48	ARHGAP19,ITGB1,mir-183,SH3PXD2A	4
Cell Cycle	M phase of cervical cancer cell lines	0.0158		-0.707	AKAP9,ANLN,CEP55,CUEDC2,GNAI1,KIF20B,MLXIPL,RAC1,SEPTIN7,SVIL	10
Cell Cycle	Cell cycle progression of tumor cell lines	0.016		-0.804	AHR,BRAF,CACUL1,CASP2,CDK1,CDK14,CDK6,CDKN2A,CHN2,CHUK,CXCL12,DDIT4,EGFR,EZH2,GDF2,HELLS,HGF,IGFBP3,IL6,MAD1L1,MAPK8,PTEN,RAC1,RASSF4,SMC3,SND1,TACC2,USP42	28
Cellular Movement	Migration of hepatoma cell lines	0.0163		1.325	CXCL12,EGFR,FGFR2,GNAI1,HGF,HOXA1,IGF2BP3,IGFBP3,IRF5,LEP,PTEN,RAC1,SNCG	13
Cellular Movement	Cell movement of hepatoma cell lines	0.0166		1.597	CDK14,CXCL12,EGFR,FGFR2,GNAI1,HGF,HOXA1,IGF2BP3,IGFBP3,IRF5,LEP,PTEN,RAC1,SNCG	14
Cell Death and Survival,Nervous System Development and Function	Cell viability of neurons	0.0173		-0.447	CASP2,GFRA1,GLI3,HGF,IL6,TMEM106B	6
Lipid Metabolism,Small Molecule Biochemistry,Vitamin and Mineral Metabolism	Synthesis of terpenoid	0.0173		0.239	AKR1B15,AKR1D1,CALN1,CH25H,CREM,CRHR2,CYP17A1,CYP26A1,CYP51A1,ETV1,GPAM,HGF,LEP,mir-182,mir-183,mir-96,NPC1L1,OSBPL3,SCD	19
Cellular Development,Cellular Growth and Proliferation,Hair and Skin Development and Function	Proliferation of epithelial cell lines	0.0178		1.034	ADCY1,ANLN,ARMS2,BICC1,CALCR,CCDC6,CDKN2A,EGFR,EZH2,FGFR2,FSCN1,HGF,IGF2BP3,KLHDC10,mir-148,mir-346,NPSR1,NRBF2,NUDT1,PTEN,PTN,RET,ZMIZ2,ZNF503-AS1	24
Cell Death and Survival	Apoptosis of carcinoma cell lines	0.0181	Decreased	-2.236	AKR1B10,BRAF,CASP2,CCDC6,CDKN2A,CXCL12,EGFR,EZH2,FAS,FGFR2,GLI3,HGF,HOTTIP,HOXA-AS2,HOXA11-AS,IGFBP3,IL6,MAPK8,mir-148,mir-29,PARG,PDCD4,RAC1,RET,SCD,SHH,SIRT1,SLC18A3,SMO,STK17A,TWIST1,ZEB1	32
Molecular Transport	Quantity of metal	0.0185		0.727	CALCR,CALN1,CHRM2,CXCL12,EGFR,ENTPD1,EZH2,FAS,GRK5,HGF,HTR7,IL6,mir-182,mir-183,mir-96,NPY,OPN4,PLAU,PON1,PPIA,PRKG1,SFTPA1,TAS2R4	23
